1 **Power and sample sizes estimation in clinical trials with treatment switching in**  
2 **intention-to-treat analysis: a simulation study**

3

4 Lejun Deng<sup>1#</sup>, Chih-Yuan Hsu<sup>2,3#</sup>, Yu Shyr<sup>2,3\*</sup>

5

6 <sup>1</sup>Montgomery Bell Academy, Nashville, TN, 37205, USA

7 <sup>2</sup>Department of Biostatistics, Vanderbilt University Medical Center, Nashville, TN 37232, USA

8 <sup>3</sup>Center for Quantitative Sciences, Vanderbilt University Medical Center, Nashville, TN 37232,

9 USA

10 \*corresponding authors: Yu Shyr ([yu.shyr@vumc.org](mailto:yu.shyr@vumc.org))

11 # These authors contributed equally.

12

13

14 **Abstract**

15 **Background:** Treatment switching, also called crossover, is common in clinical trials because of  
16 ethical concerns or other reasons. When it occurs and the primary objective is to identify treatment  
17 effects, the most widely used intention-to-treat analysis may lead to underpowered trials.  
18 Therefore, we plan to propose an approach to preview power reductions and to estimate sample  
19 sizes required for the desired power when treatment switching occurs in the intention-to-treat  
20 analysis.

21 **Methods:** We proposed a simulation-based approach and developed an R package to attain the  
22 purpose.

23 **Results:** We simulated a number of randomized trials incorporating treatment switching and  
24 investigated the impact of the relative effectiveness of the experimental treatment to the control,  
25 the switching probability, the allocation ratio, and the switching time on power reductions and  
26 sample sizes estimation. The switching probability and the switching time are key determinants  
27 for significant power decreasing and thus sample sizes surging to maintain the desired power. The  
28 sample sizes required in randomized trials absence of treatment switching varied from around  
29 three-fourths to one-twelfths of the sample sizes required in randomized trials allowing treatment  
30 switching as the probability of switched patients increased. The power reductions and sample sizes  
31 increase with the decrease of switching time.

32 **Conclusions:** The simulation-based approach not only provides a preview for power declining but  
33 also calculates the required sample size to achieve an expected power in the intention-to-treat  
34 analysis when treatment switching occurs. It will provide researchers and clinicians with useful  
35 information before randomized controlled trials are conducted.

## 36 37 **Keywords**

38 Crossover; intention-to-treat analysis; randomized controlled trials; treatment switching

## 39 40 **1. Background**

41 Clinical trials are often used to assess the effectiveness of new treatments. The most reliable  
42 clinical trial is the randomized controlled trials (RCT). In an RCT, patients are randomly assigned  
43 to the control group, where they receive a placebo or an existing standard treatment, or the  
44 experimental group, where they receive the experimental treatment. For treatments against  
45 diseases like cancer, the effectiveness of the new treatment is determined by comparing the

46 observed survival time of patients in the experimental group to those in the control group. The  
47 power of a statistical test, which is the probability to correctly tell if the experimental treatment is  
48 better when it is truly better, is extremely important. Being able to correctly determine the  
49 effectiveness of an experimental treatment gives justification for its production, allows for better  
50 utilization of resources, and helps those who will benefit from the experimental treatment.

51  
52 A common method used to interpret the data from a RCT is the intention-to-treat analysis (ITT).  
53 The ITT analysis includes all patients with randomization in statistical analysis and compares their  
54 responses to determine the effectiveness of the experimental treatment according to the treatment  
55 group that was initially assigned to them, regardless of what treatment they actually received.  
56 Patients, however, do not always comply with the treatment they were assigned. Because of ethical  
57 concerns or other reasons, they may switch treatments from the control group to the experimental  
58 group. For example, it may occur when a disease progresses or when the healthcare provider  
59 believes the patient's prognosis will improve with the experimental treatment. When treatment  
60 switching, also called crossover, is permitted, the ITT analysis is confounded, which decreases the  
61 power of a statistical test. A simple and alternative approach, such as the per-protocol analysis,  
62 excludes the subjects who switch treatments from the statistical analysis. Nevertheless, this may  
63 heavily bias the analysis results if the subjects included and excluded in the analysis significantly  
64 differ in prognosis, i.e., treatment switching is associated with prognostic variables [1].

65  
66 Various statistical methods dealing with treatment switching have been proposed. Law and Kaldor  
67 [2] proposed the adjusted Cox model by splitting the study population into four groups according  
68 to their initial and final treatment groups and by assuming different hazard functions with time

69 dependent covariates defined by the time of switching treatment for the four group. Loeys and  
70 Goetghebeur [3] proposed the causal proportional hazards estimator by assuming that patients in  
71 one arm complete their treatment while the patients in the other arm either completely fulfill their  
72 treatment or does not fulfill their treatment at all. Robins and Tsiatis [4] proposed correcting for  
73 non-compliance by using the rank preserving structural accelerated failure time models (RPSFT).  
74 Based on the RPSFT, Branson and Whitehead [5] and Zhang and Chen [6] provided iterative  
75 parametric estimation and modified iterative parametric estimation methods, respectively, for fast  
76 and reliably estimating the treatment effect. Morden et al. [1] and Latimer et al. [7, 8] performed  
77 simulations studies to compare several adjustment methods mentioned above.

78  
79 However, sample sizes estimation in most RCTs is still based on the assumption of no treatment  
80 switching and predetermined statistical tests, such as the logrank test in ITT analysis. Given the  
81 sample sizes estimated from no-switching designs, the ITT analysis may underestimate the positive  
82 treatment effect when treatment switching occurs. In this study, we proposed a simulation-based  
83 approach, *PowerSwitchingTrial*, to preview power reductions and calculate sample sizes required  
84 in RCTs allowing treatment switching. We investigated the impact of the relative effectiveness of  
85 the experimental treatment to the control, the switching probability, the allocation ratio, and the  
86 switching time on power reductions and sample sizes estimation. We found the switching  
87 probability and the switching time are key determinants for power decreasing and thus sample  
88 sizes increasing to maintain the desired power in ITT analysis. *PowerSwitchingTrial* is freely  
89 available at <https://github.com/darwin-hub/PowerSwitchingTrial>.

90

91

## 92 **2. Methods**

### 93 **2.1 *PowerSwitchingTrial* overview**

94 *PowerSwitchingTrial* is a simulation-based R package, developed for exploring statistical powers  
95 and sample sizes required in RCT trials allowing treatment switching when the logrank test is used  
96 in ITT analysis. The flowchart of *PowerSwitchingTrial* is shown in Fig. 1. *PowerSwitchingTrial*  
97 simulates a two-arm randomized clinical trial study with an accrual time of  $T_a$  and an additional  
98 follow-up time of  $T_e - T_a$ , where  $T_e$  is the time from the start to the end of the trial. Participants  
99 are assumed to enter the study uniformly during the accrual time period, and soon be randomly  
100 assigned to one of the two treatment groups, the control group ( $TX_1$ ) or the experimental group  
101 ( $TX_2$ ), with an allocation ratio of  $r$  ( $r = TX_2/TX_1$ ). The survival time of subjects in the control and  
102 experimental groups, denoted by  $T_1$  and  $T_2$ , is assumed to follow exponential distributions with  
103 the median value of  $m_1$  and  $m_2$ , respectively. The censoring time of subjects in the two groups,  
104 denoted by  $C_1$  and  $C_2$ , is defined as the time from randomization until the end of the trial if the  
105 subjects do not experience the event of interest.

106  
107 *PowerSwitchingTrial* allows subjects in the control group have a chance to switch to the  
108 experimental group if predetermined conditions are satisfied. For example, if patients with cancer  
109 are observed to have a disease progression before death (assume death is the event of interest),  
110 they may switch from the standard treatment to the new treatment after disease progression. The  
111 switching time, denoted by  $s$ , is defined as the time from randomization until treatment switching.  
112  $s$  is fixed or random, which depends on a practical application. For example,  $s$  will be fixed if  
113 there is a time set in a clinical trial to switch treatments, while  $s$  will be random if the switching  
114 time depends on disease progression. In the setting of random  $s$ , we assume  $s = X \times T_1$ , where

115  $X$  is a random variable generated from a beta distribution with the parameters of  $a$  and  $b$ , namely  
116  $\text{Beta}(a,b)$ . The two parameters control the relationship between  $s$  and  $T_1$ . Moreover,  
117 *PowerSwitchingTrial* considers a parameter of  $p$  (switching probability) to define the probability  
118 that a subject who qualifies for treatment switching will switch from  $TX_1$  to  $TX_2$  after evaluations  
119 from physicians or health care professionals. The survival time for subjects starting from switching  
120 is assumed to increase by a constant multiplier of  $A$ , based on the rank preserving structural failure  
121 time model [4]. That is, the survival time of the subjects with treatment switching will be  $T_1^* =$   
122  $s + (T_1 - s) \times A$ . Therefore, the observable survival time  $Y_1$  for the subjects who are  
123 originally assigned to  $TX_1$  will be equal to  $\min(T_1, C_1)$  without treatment switching, and  
124  $\min(T_1^*, C_1)$  with treatment switching. The observable survival time  $Y_2$  for the subjects in  $TX_2$   
125 will be equal to  $\min(T_2, C_2)$ . Finally, the logrank test is used to compare  $Y_1$  and  $Y_2$ .

126

## 127 **2.2 Two main functions of *PowerSwitchingTrial***

128 *PowerSwitchingTrial* provides two main functions, *LogRankTestMix2PowerMedian* and  
129 *LogRankTestMix2Nmedian*. *LogRankTestMix2PowerMedian* calculates the power, given sample  
130 sizes, the difference in the survival time between two groups, and the other parameters.  
131 *LogRankTestMix2NMedian* estimates sample sizes, given an expected power to detect the  
132 difference in the survival time between two groups, and the other required parameters.

133

134 *LogRankTestMix2PowerMedian*, a function to calculate the power, includes 13 input parameters  
135 to simulate a number of scenarios,  $n$ ,  $m_1$ ,  $m_2$ ,  $r$ ,  $T_a$ ,  $T_e$ ,  $p$ ,  $\alpha$ ,  $\text{random}$ ,  $s$ ,  $a$ ,  $b$ , and  $\text{reps}$ .  $n$  is  
136 the number of participants in the control group,  $m_1$ ,  $m_2$ ,  $r$ ,  $T_a$ ,  $T_e$ , and the switching probability  
137 ( $p$ ) were defined in Section 2.1,  $\alpha$  is the significance level, and  $\text{reps}$  is the number of computer

138 simulations. The *random* is a logic indicator, FALSE or TRUE. If *random* = FALSE, the switching  
139 time is fixed and *s* is required; if *random* = TRUE, the switching time is random and the  
140 parameters of *a* and *b* in the beta distribution are required. The function will return the power, that  
141 is, the average number of rejecting the null hypothesis which suggests no difference in survival  
142 time between the two treatment groups across *reps* simulations.

143  
144 *LogRankTestMix2Nmedian* is a function to calculate the sample sizes. *LogRankTestMix2NMedian*  
145 uses the same parameters as *LogRankTestMix2PowerMedian*, except the parameter of *n* that is  
146 replaced by *power*, *lower*, and *upper*. Lower and upper is the minimum and maximum sample  
147 sizes that users set to explore. The function uses the bisection method to find the sample size (*n*)  
148 required between the initial *lower* and *upper* bounds.

149

150

### 151 **3. Results**

152 A number of scenarios were generated to explore the effect of treatment switching on powers and  
153 sample sizes estimation in ITT analysis, which included the relative different effectiveness of the  
154 experimental treatment to the control, the different switching probability, the different allocation  
155 ratio, and the fixed/random switching time. In each scenario, the accrual time  $T_a$  was set to 3, the  
156 study time  $T_e$  was set to 5, and  $m_1$  was set to 1. Under no treatment switching, the expected power  
157 to detect the survival difference between two treatment groups was set as 0.8 and the significance  
158 level was set as 0.05. The number of computer simulations was set at 5,000.

159

#### 160 **3.1 Effect of the relative effectiveness on power and sample sizes estimation**

161 We first investigated the impact of the relative effectiveness of the experimental treatment to the  
162 control ( $m_2/m_1$ ) on power and sample sizes estimation, which ranged at 1.25, 1.5, 1.75, and 2  
163 (Supplementary Tables s1-s3). We found the power decreased and the ratio of sample sizes with  
164 treatment switching to those absence of switching ( $n_s/n_{no-s}$ ) increased slightly with the rising  
165 relative effectiveness (Fig. 2). For example, given  $r = 1$ ,  $p = 0.4$ , and  $s = 0.5$ , the ratio  
166 increased from 1.94 to 2.07 and the power decreased from 0.52 to 0.50 when the relative  
167 effectiveness grew from 1.25 to 2 (Supplementary Table s1).

168

### 169 **3.2 Effect of the switching probability on power and sample sizes estimation**

170 We further evaluated the effect the switching probability ( $p$ ) on power and sample sizes  
171 estimation, which was set at 0.2, 0.4, 0.6, 0.8, and 1.0. We found the power decreased and the ratio  
172 of sample sizes ( $n_s/n_{no-s}$ ) increased significantly with the enlarging switching probability (Fig.  
173 3). For example, the ratio of sample sizes increased from  $\sim 1.4$  to  $\sim 11.6$  and the power decreased  
174 from  $\sim 0.7$  to  $\sim 0.1$  When the switching probability increased from 0.2 to 1.0 (Supplementary Table  
175 s1). The result indicates that the switching probability is critical for power and sample sizes  
176 estimation. A small change of the switching probability would require much more sample sizes to  
177 maintain the expected power.

178

### 179 **3.3 Effect of the allocation ratio on power and sample sizes estimation**

180 Moreover, we examined the effect of the allocation ratio ( $r$ ) on power and sample sizes estimation,  
181 which was set at 1 and 2. The sample size required for the control group decreased as the allocation  
182 ratio increased from 1 to 2, the total sample size increased though. The ratio of sample sizes  
183 ( $n_s/n_{no-s}$ ) increased slightly but the power didn't show a clear increasing or decreasing pattern.



184 For example, under  $s = 0.5$ , given  $p = 0.2$ , the power with  $r = 1$  was larger than that with  
185  $r = 2$ . In contrast, the power with  $r = 1$  was smaller than that with  $r = 2$  given  $p = 1$   
186 (Supplementary Table s1).

187

### 188 **3.4 Effect of the switching time on power and sample sizes estimation**

189 Finally, we explored the effect of the switching time on power and sample sizes estimation. The  
190 switching time ( $s$ ) was either set at a fixed value or generated by random. The switching time was  
191 set at 0.5 and 1 if fixed, otherwise the switching time was generated by a product of survival time  
192 of the control group and a random variable from a beta distribution with shape parameters of  $a =$   
193  $2$  and  $b = 2$ . The mean of the random switching time was 0.5. Overall, the ratios of sample sizes  
194 ( $n_s/n_{no-s}$ ) using random switching time were smaller than those using the fixed switching time  
195 of 0.5 (Fig. 4 and Supplementary Tables s1 and s2). The ratio of sample sizes ( $n_s/n_{no-s}$ ) increased  
196 and power decreased significantly when the fixed switching time moved to an earlier time point  
197 (from 1 to 0.5), especially when the switching probability  $p$  is greater than 0.6 (Fig.4 and  
198 Supplementary Table s1 and s3). For example, the ratio of sample sizes decreased from  $\sim 11$  to  $\sim 3$   
199 when the switching time moved from 0.5 to 1 under  $p = 1$ ,  $r = 1$ , and  $m_2/m_1 = 1.5$  (Fig. 4).  
200 The results indicated that the switching time is also a key factor for power reductions and sample  
201 sizes increase in clinical trials with treatment switching.

202

## 203 **4. Discussion**

204 Our simulation study showed a standard ITT analysis failing to consider treatment switching  
205 resulted in a significant reduction of statistical powers especially when the switching probability  
206 is high and the switching time is early, which indicated that a much larger sample size was required

207 to maintain the expected power. The sample sizes required in RCTs absence of treatment switching  
208 varied from around three-fourths to one-twelfths of the sample sizes required in RCTs allowing  
209 treatment switching as the probability of switched patients increased. The growth of the relative  
210 effectiveness and the switching probability increased the ratio of samples and decreased the power,  
211 while the later switching time decreased the ratio of sample sizes and increased the power. The  
212 allocation ratio was slightly associated with the increasing sample sizes but was not associated  
213 with the decreasing power.

214  
215 *PowerSwitchingTrial* assumed the effects of the experimental treatment were the same for the  
216 subjects switched from  $TX_1$  to  $TX_2$  and those initially assigned to  $TX_2$ , which is the same as the  
217 “common treatment effect” assumption made by RPSFTM [8]. In some cases, the assumption may  
218 be problematic. The subjects switched from  $TX_1$  to  $TX_2$  may be associated with worse survival.  
219 Properly adjusting the accelerated factor  $A$  may be useful to fit the scenario. Multiplying a constant  
220 that is less than 1 to  $A$  may be a solution, but it is difficult to determine the constant value before  
221 clinical trials even if we can borrow the information from previous similar studies.

222  
223 The assumption of exponential distributions for survival time also limits the flexibility and practice  
224 of *PowerSwitchingTrial*. Survival times do not always follow exponential distributions well.  
225 Weibull or gamma distribution may be alternatives to exponential distributions. However, it is not  
226 easy for clinicians to determine a non-exponential distribution with at least two parameters.  
227 Median survival or mean survival is still commonly used, which leads to favoring of exponential  
228 distributions. In addition, *PowerSwitchingTrial* assumed the censoring time depended only on the  
229 entry time and study time although other factors that would cause censoring include a small

230 proportion of patients dropping out from the study and a loss of follow up. This was due to no need  
231 for additionally assuming a probability distribution for the censoring time.

232

233 The current version of *PowerSwitchingTrial* is built for two-arm RCTs. It can be extended to multi-  
234 arm RCTs, straightforwardly but not simply. More parameters need to be determined in multi-arm  
235 clinical trial designs. We plan to extend *PowerSwitchingTrial* for multi-arm RCTs in the near  
236 future.

237

## 238 **5. Conclusions**

239 In this study, we proposed a simulation-based approach, *PowerSwitchingTrial*, to evaluate  
240 statistical powers and sample sizes required in RCTs allowing switching in ITT analysis when the  
241 logrank test is used. The approach not only provides a preview for power declining but also  
242 calculates the required sample size to achieve an expected power when treatment switching occurs.  
243 It will provide researchers and clinicians with useful information before RCTs are conducted.

244

245

## 246 **Abbreviations**

247 **ITT:** intention-to-treat

248 **RCT:** randomized controlled trials

249 **RPSFT:** rank preserving structural accelerated failure time models

250

## 251 **Declarations**

252 **Ethics approval and consent to participate**

253 Not applicable.

254 **Consent for publication**

255 Not applicable.

256 **Availability of data and materials**

257 Additional file 1: Supplementary Tables s1-s3.

258 **Competing interests**

259 The authors declare that they have no competing interests.

260 **Funding**

261 This work was supported by the National Institutes of Health [P30CA068485, U24CA163056,  
262 U24CA213274, P50CA236733, P50CA098131, U54CA163072].

263 **Authors' contributions**

264 LD and CYH were major contributors in writing the manuscript and developing the R package.  
265 YS was the major contributor in the conception and design of the work.

266 **Acknowledgements**

267 Not applicable.

268

## 269 **References**

- 270 1. Morden, JP, Lambert PC, Latimer N, Abrams, KR, Wailoo, AJ. Assessing methods for dealing  
271 with treatment switching in randomised controlled trials: a simulation study. BMC Medical  
272 Research Methodology. 2011; 11, 4.
- 273 2. Law, MG, Kaldor, JM. Survival analyses of randomized clinical trials adjusted for patients  
274 who switch treatments. Statistics in Medicine. 1996; 15: 2069-2076.
- 275 3. Loeys, T, Goetghebeur, E. A Causal Proportional Hazards Estimator for the Effect of  
276 Treatment Actually Received in a Randomized Trial with All-or-Nothing Compliance.  
277 Biometrics. 2003; 59: 100-105.
- 278 4. Robins, JM, Tsiatis, AA. Correcting for non-compliance in randomized trials using rank  
279 preserving structural failure time models, Communications in Statistics - Theory and Methods.  
280 1991; 20, 2609-2631.
- 281 5. Branson M, Whitehead J. Estimating a treatment effect in survival studies in which patients  
282 switch treatment, Statistics in Medicine. 2002; 21, 2449-2463.
- 283 6. Zhang J, Chen, C. Correcting treatment effect for treatment switching in randomized oncology  
284 trials with a modified iterative parametric estimation method. Statistics in Medicine. 2016; 35,  
285 3690-3703.
- 286 7. Latimer, NR, Abrams, KR, Lambert, PC, Crowther, MJ, Wailoo, AJ, Morden, JP, et al.  
287 Adjusting for treatment switching in randomised controlled trials – a simulation study and a  
288 simplified two-stage method. Statistical Methods in Medical Research. 2017; 26, 724-751.
- 289 8. Latimer, NR, Abrams, KR, Lambert, PC, Morden, JP, Crowther, MJ. Assessing methods for  
290 dealing with treatment switching in clinical trials: A follow-up simulation study. Statistical  
291 Methods in Medical Research. 2018; 27, 765-784.

292

293

294

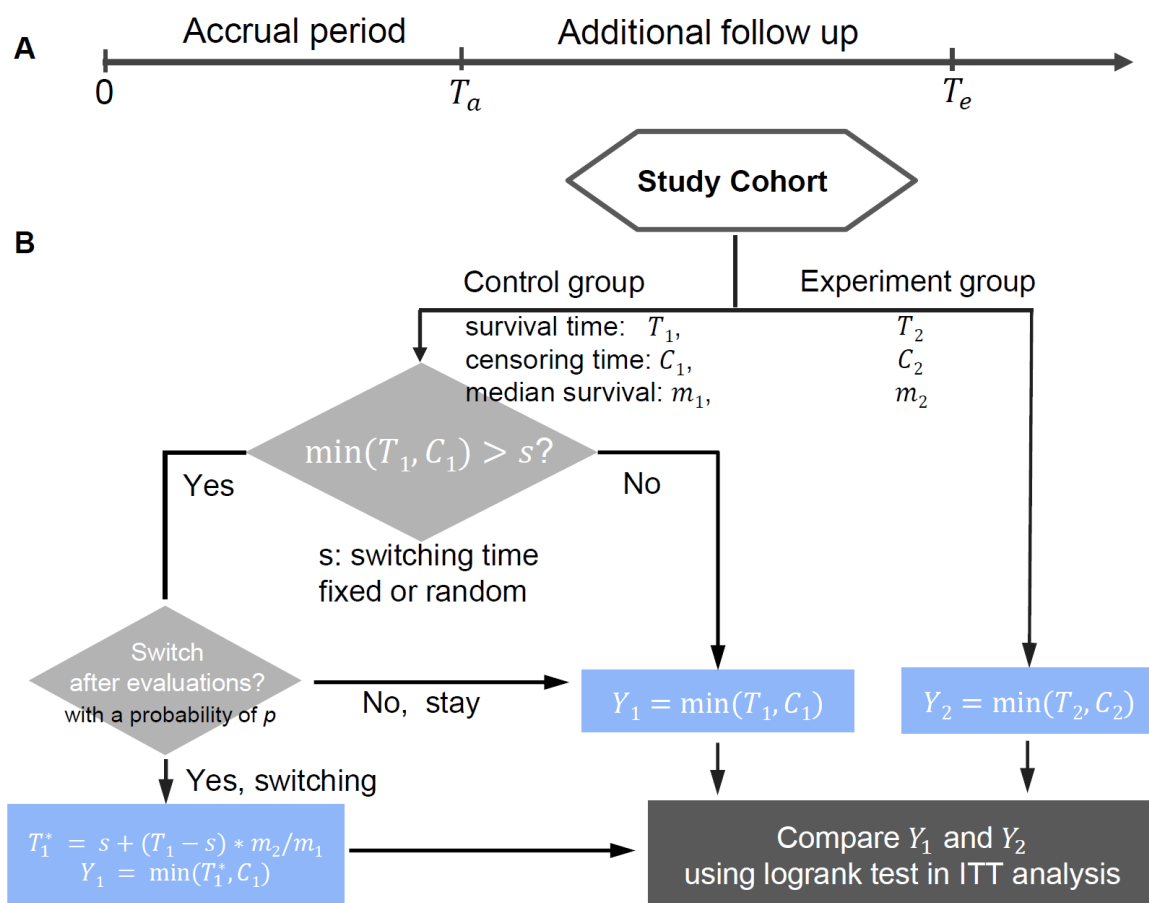

295

296 **Figure 1. A flowchart of *PowerSwitchingTrial*.**

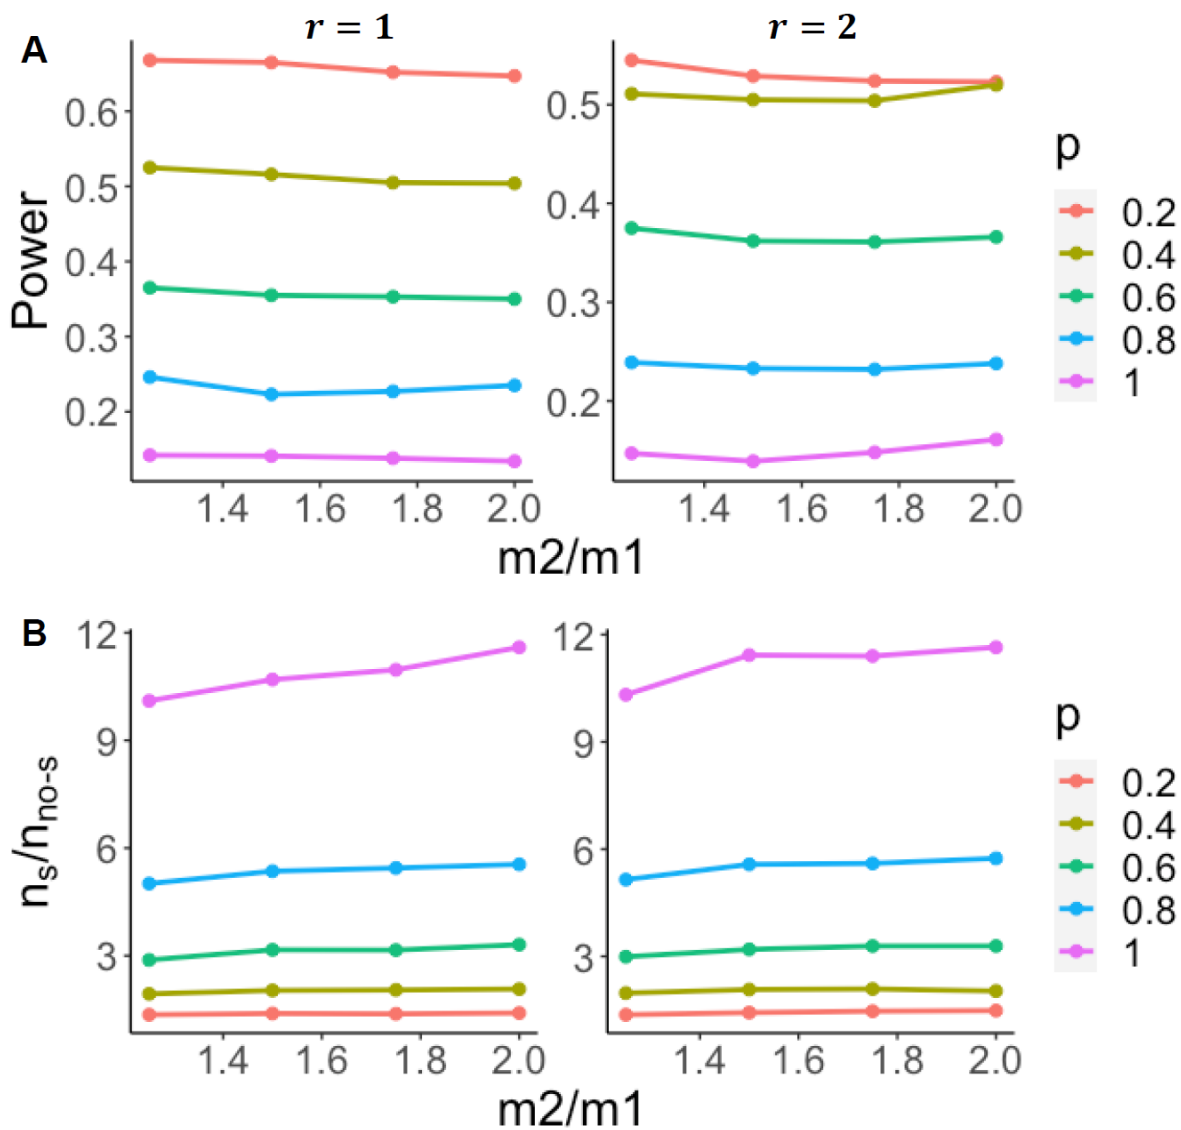

297

298 **Figure 2. Effect of relative effectiveness on power (A) and sample sizes estimation (B). *s* =**

299 0.5.

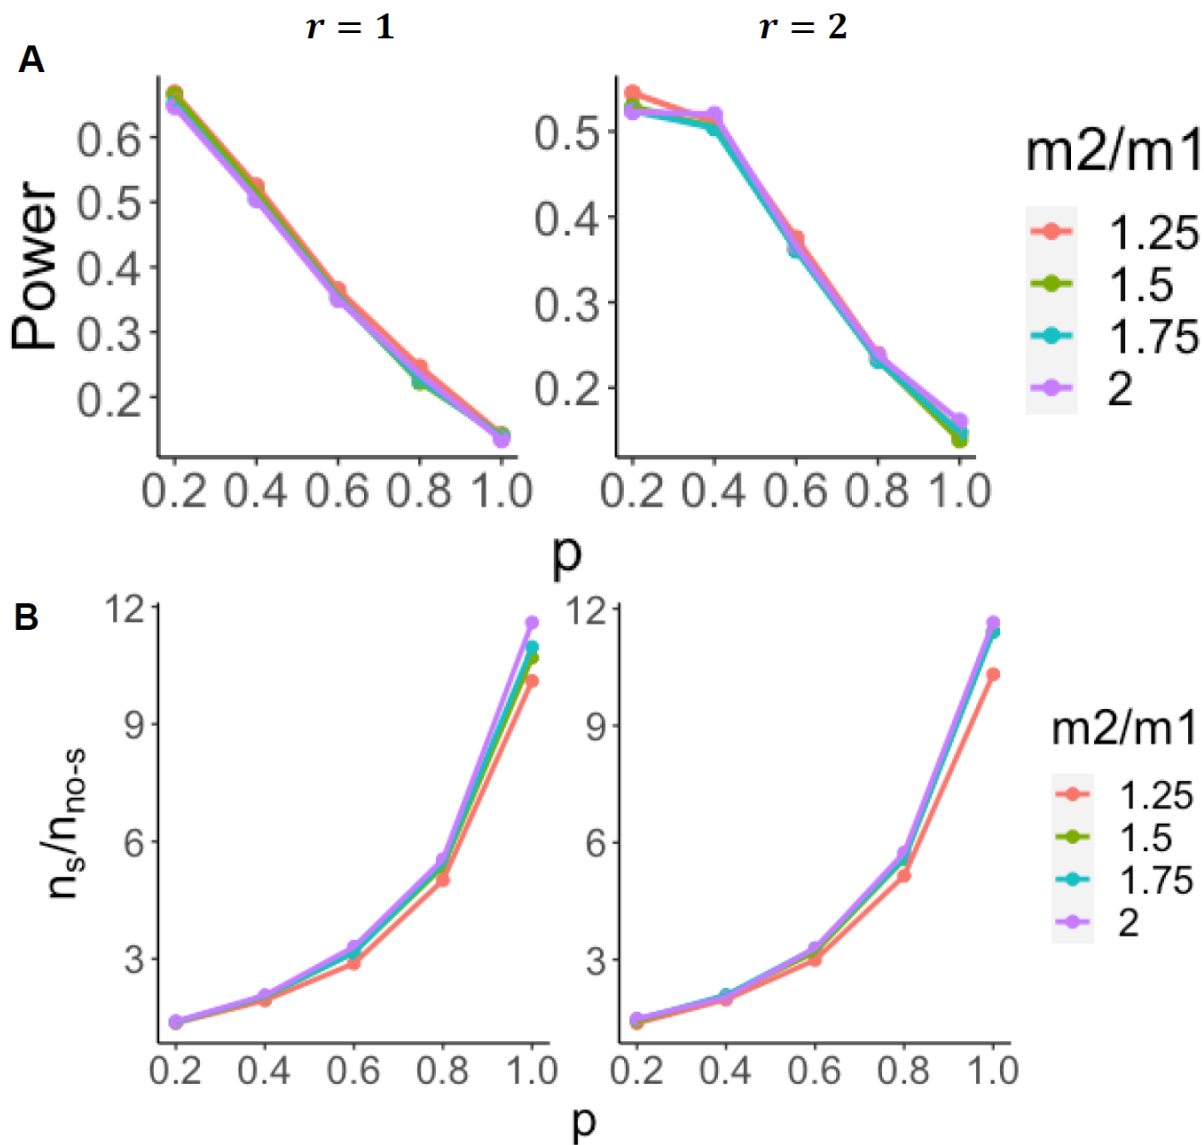

300

301 **Figure 3. Effect of switching probability on power (A) and sample sizes estimation (B).  $s =$**

302 0.5.



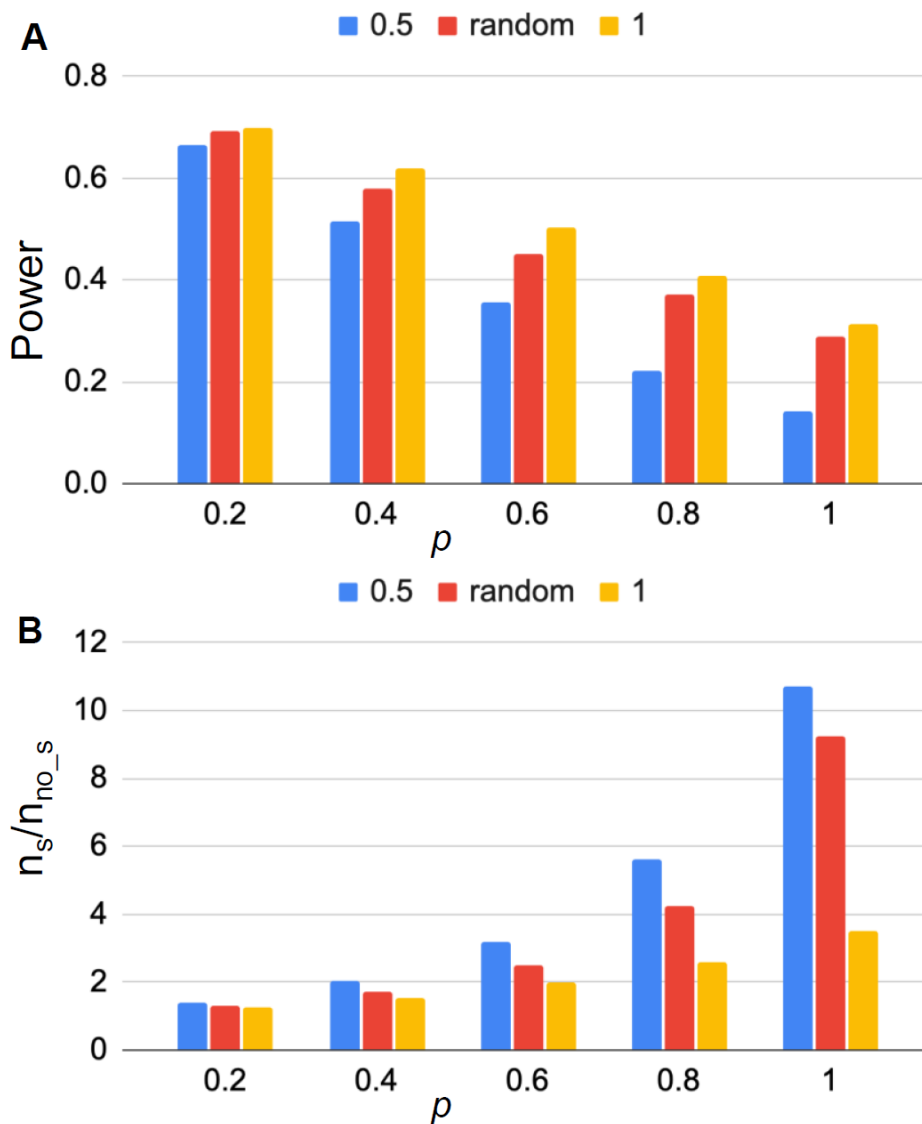

303

304 **Figure 4. Effect of switching time on power (A) and sample sizes estimation (B).  $s = 0.5$**

305 (blue),  $s = 1$  (orange) or  $s$  is random based on a beta distribution with mean value of 0.5 (red)

306 under  $r = 1$  and  $m_2/m_1 = 1.5$ .

307
